# 1 **AGO104 is an RdDM effector of paramutation at the maize *b1* locus.**

2

3 Juliette Aubert <sup>1¶</sup>, Fanny Bellegarde <sup>2¶</sup>, Omar Oltehua-Lopez <sup>3</sup>, Olivier Leblanc <sup>1</sup>, Mario A. Arteaga-  
4 Vazquez <sup>3</sup>, Robert A. Martienssen <sup>4</sup> & Daniel Grimanelli <sup>1\*</sup>

5

6 <sup>1</sup> DIADE, University of Montpellier, CIRAD, IRD, Montpellier, France

7 <sup>2</sup> Graduate School of Bioagricultural Sciences, Nagoya University, Chikusa, Nagoya, Japan

8 <sup>3</sup> Universidad Veracruzana, INBIOTECA, Xalapa, Veracruz, Mexico

9 <sup>4</sup> Howard Hughes Medical Institute, Cold Spring Harbor Laboratory, Cold Spring Harbor, NY, USA

10

11 ¶ These authors contributed equally to this work.

12 \* Author for correspondence: [daniel.grimanelli@ird.fr](mailto:daniel.grimanelli@ird.fr) (DG)

13

14

## 15 **Abstract**

16 Paramutation is an exception among eukaryotes, in which epigenetic information is conserved through  
17 mitosis and meiosis. It has been studied for over 70 years in maize, but the mechanisms involved are  
18 largely unknown. Previously described actors of paramutation encode components of the RNA-  
19 dependent DNA-methylation (RdDM) pathway all involved in the biogenesis of 24-nt small RNAs.  
20 However, no actor of paramutation have been identified in the effector complex of RdDM. Here,  
21 through a combination of reverse genetics, immunolocalization and immunoprecipitation (siRNA-IP)  
22 we found that ARGONAUTE104 (AGO104), AGO105 and AGO119 are members of the RdDM effector  
23 complex in maize and bind siRNAs produced from the tandem repeats required for paramutation at  
24 the *b1* locus. We also showed that AGO104 is an effector of the *b1* paramutation in maize.

25

26

## 27 **Author summary**

28 Reprogramming of epigenetic information has been described in both plants and mammals. Here, we  
29 show that maize *ARGONAUTE (AGO) AGO104* and *AGO105/AGO119*, respectively the close homologs  
30 of *A. thaliana AGO9* and *AGO4*, are required to enable paramutation at the *b1* locus in maize.  
31 Paramutation is an epigenetic phenomenon that is stable over many generations (both mitotically and  
32 meiotically). A classic example is the *booster1 (b1)* gene in maize, where the weakly expressed *Booster'*  
33 (*B'*) allele stably decreases the expression of the *Booster-Intense (B-I)* allele, and changes it into a new  
34 *B'* allele. This new *B'* allele will in turn change *B-I* into new *B'* in subsequent crosses. Previous research  
35 demonstrated that paramutation requires several proteins involved in the biosynthesis of small  
36 interfering RNAs (siRNAs) all related to the RNA-dependent DNA-methylation (RdDM) pathway. Yet,  
37 few members of the RdDM were functionally identified in maize. Here, we identify two new members  
38 of the maize RdDM pathway, and provide evidence that they are also involved in paramutation at the  
39 *b1* locus.

40

41

## 42 **Introduction**

43 Paramutation is defined as the heritable transmission of epigenetic information that is both mitotically  
44 and meiotically stable [1–4]. There are four classical examples of paramutation in maize: the *red1 locus*  
45 (*r1*), the *plant color1 locus (p1)*, the *pericarp color1 locus (p1)*, and the *booster1 locus (b1)*.  
46 Paramutation at the *b1* locus that encodes a transcription factor involved in the biosynthesis of  
47 anthocyanin pigments is one of the best characterized systems [5–7]. It involves the interaction  
48 between two alleles, the *BOOSTER-INTENSE* allele (*B-I*), in which *b1* is highly expressed and results in  
49 dark purple pigmentation in most mature vegetative tissues, and the *BOOSTER'* (*B'*) allele in which *b1*  
50 is weakly expressed and the plants are lightly pigmented. *B'* induces the meiotically stable *trans-*  
51 silencing of *B-I* and once *B-I* is changed into *B'* the change is permanent. Paramutation at the *b1* locus  
52 requires the presence of 7 tandem repeats (*b1TR*) located ~100 kb upstream of *b1*. The *b1TR* produce

53 24 nucleotide (nt) small interfering RNAs (siRNAs) through the RNA-dependent DNA Methylation  
54 (RdDM) pathway that are required for paramutation [1,5,6]. Expression of *b1TR*-siRNAs from a  
55 transgene expressing a hairpin RNA recapitulates all features of *b1* paramutation [7].

56

57 Previous studies demonstrated that paramutation has an establishment phase in developing embryos  
58 and a maintenance phase in somatic cells (Reviewed in [8]). There is evidence that the RdDM pathway  
59 is critical for both establishment and maintenance of paramutation in maize [9–12]. The RdDM  
60 pathway has been extensively described in *Arabidopsis thaliana* (Fig 1) (reviewed in [13–16]). It differs  
61 significantly in maize, with several of the catalytic subunits specific to either RNA POLYMERASE (POL)  
62 POLIV or POLV [17]. RdDM in maize is responsible for two main functions. The first one is devoted to  
63 the biogenesis of 24-nt siRNAs and the second one, called the effector complex, uses these siRNAs as  
64 guides to target chromatin and lead to DNA methylation. In the first step, POL IV transcripts are  
65 immediately converted into double-stranded RNAs (dsRNAs) by MEDIATOR OF PARAMUTATION1  
66 (MOP1), the homolog of *A. thaliana* RNA-DEPENDENT RNA POLYMERASE (RDR) RDR2. DICER-LIKE3a  
67 (DCL3a) then slices these dsRNAs into 24-nt siRNAs [18,19]. The effector complex induces DNA  
68 methylation at either CG, CHG or CHH sites (where H=A, T, or C). In *A. thaliana*, it initiates with  
69 AGO4/6/9 [20,21], that guide the siRNAs to the transcripts generated by POL V. POL V also interacts  
70 with DEFECTIVE IN RNA DIRECTED DNA METHYLATION 1 (DRD1), DEFECTIVE IN MERISTEM SILENCING  
71 3 (DMS3), and RNA-DIRECTED DNA METHYLATION 1 (RDM1), to produce long noncoding scaffold  
72 transcripts. This complex then recruits two histone methyltransferases of the SUVH family, SUVH2 and  
73 SUVH9, that can bind DNA but have lost catalytic activity [15]. The AGO4/6/9 complex then partners  
74 with DOMAINS REARRANGED METHYLTRANSFERASE (DRM), DRM2 and DRM1, to enable DNA  
75 methylation in all sequence contexts [13,16,17]. By sequence similarity, putative homologues of  
76 *AtAGO4/6/9* have been proposed in maize. *ZmAGO104* is the closest homologue of *AtAGO9* and both  
77 *ZmAGO105* and *ZmAGO119* are the most probable homologues for *AtAGO4* [22]. To date, RdDM  
78 members found to affect paramutation in maize include MOP1 [9,23] and two REQUIRED TO

79 MAINTAIN REPRESSION (RMR), RMR6/MOP3 that encodes the largest subunit of POL IV [9–12] and  
80 RMR7/MOP2 that encodes a subunit shared between POL IV and POLV [24–26]. These proteins are  
81 essential to maintain the paramutation states, especially MOP1 as illustrated by the dark purple  
82 phenotype in *mop1* mutant progenies [23]. Interestingly, although RMR7/MOP2 is also involved in POL  
83 V machinery, no RdDM actor from the effector complex was identified (Fig 1).

84

85 The goal of this work was to determine whether AGO104 and/or AGO105 are involved in paramutation  
86 as part of the RdDM effector complex. We used a reverse-genetics approach to search for  
87 paramutation-associated phenotypes in *ago104* and *ago105* mutants. A novel intermediate plant  
88 pigmentation was identified in the progeny of *ago104* mutant. Using immunolocalization and  
89 immunoprecipitation, we showed that AGO104 and AGO105 have a similar function and localization  
90 to that of their homologs in *A. thaliana*. We sequenced the small RNAs bound by AGO104 and  
91 AGO105/AGO119 and showed that they target the *b1TR* repeats. Taken together, this data indicate  
92 that we identified AGO104 and AGO105/AGO119 as new members of the RdDM effector complex in  
93 maize, and we showed that AGO104 is also involved in paramutation at the *b1* locus. This research  
94 provides a deeper understanding of the establishment of paramutation as well as new insights into the  
95 role of RdDM in maize.

96

97

## 98 **Results**

### 99 **Reverse genetics shows an intermediate phenotype in *ago104-5***

100 To study the involvement of AGO104 and AGO105 in paramutation, we selected two mutator-induced  
101 alleles, respectively *ago104-5*, previously characterized by [22] as a dominant allele creating defects  
102 during female meiosis and apomixis-like phenotypes, and the uncharacterized *ago105-1* (S1a Fig). Both  
103 mutations were backcrossed three times to the B73 inbred line, that is neutral for paramutation at the  
104 *b1* locus as it carries a *b* allele with a single tandem repeat [27].

105

106 We performed three successive crosses to generate a paramutagenic population of plants combining  
107 *mop1-1* and either *ago104-5* or *ago105-1* mutant alleles (S1b Fig). To do so, we firstly crossed  
108 recessive homozygous *mop1-1* mutant (dark purple *B'* plants) to heterozygous *mop1-1* mutant (lightly  
109 pigmented *B'* plants). The resulting progeny were only *B'* plants (either homozygous or heterozygous  
110 for *mop1-1*). After validation by genotyping, homozygous *mop1-1* mutants (dark purple *B'* plants) were  
111 crossed with either homozygous *ago104-5* or *ago105-1* mutants (i. e. green plants that harbor a *b*  
112 allele neutral to paramutation). All the resulting progeny were double heterozygous mutant for *mop1-*  
113 *1* and either *ago104-5* or *ago105-1* (*B'/b* plants). We evaluated plant pigmentation in these double  
114 mutants for our reverse genetic screening. All observed phenotypes have to be stable through meiosis  
115 in order to be relevant to paramutation. Consequently, our 3<sup>rd</sup> crossing scheme consisted in a  
116 backcross between the double heterozygous mutants (green *B'/b* plants) and homozygous *mop1-1*  
117 plants (dark purple *B'* plants). The resulting progeny could be either single *mop1-1* mutant, or double  
118 *ago/mop1-1* mutants, with either *b* or *B'* allele. After validation by genotyping, we only conserved  
119 plants with *B'* allele that were heterozygous for *mop1-1*, or double heterozygous for *mop1-1/ago*, and  
120 evaluated plant pigmentation.

121

122 The involvement of AGO104 and AGO105 in paramutation was studied by evaluating the phenotypes  
123 at 46 days post-seeding (dps) of the previous crosses. We hypothesized that plants with disrupted  
124 paramutation would exhibit the dark purple phenotype without being homozygous for *mop1-1*. As  
125 expected for the control plants, all the homozygous *mop1-1* plants were dark purple at 46 dps, while  
126 all wild type plants were lightly pigmented. Interestingly, a new phenotype emerged in the progeny of  
127 the backcrossed double heterozygous *Mop1/mop1-1;Ago104-5/ago104-5* mutants. Seven of them  
128 showed typical lightly pigmented tissues while 16 plants exhibited a previously unseen phenotype  
129 characterized by intermediate pigmentation levels, suggesting that anthocyanin production was  
130 increased compared to that of *B'* but could not achieve the typical dark purple phenotype of *B-I* plants

131 at 46 dps (Fig 2). We quantified the levels of pigmentation from the lightly pigmented, intermediate  
132 and dark purple phenotypes at 46 dps using picture processing on ImageJ. We measured pixel color  
133 from husk tissues of the 3 phenotypes, and both ANOVA (p-value = 0,00385) and Tukey's 'Honest  
134 Significant Difference' test (p-value between 0,003 and 0,02) indicated a significant color difference  
135 between the 3 phenotypes. The pigmentation turns darker over time, and reaches levels at 56 dps  
136 similar to that observed in *mop1-1/mop1-1* (S2 Fig). Interestingly, this new phenotype happened only  
137 when the *ago104-5* allele was present in at least one parent, indicating that the parental genotype  
138 might influence the progeny's phenotype. The partial reversion of the paramutation phenotype  
139 associated with *ago104-5* allele suggests that AGO104 is an effector of paramutation. On the other  
140 hand, the *ago105-1* mutant caused no phenotype and thus our crossing scheme did not allow  
141 evaluating its role in paramutation. Because of high sequence similarity between *ago105* and *ago119*,  
142 we crossed *ago105-1* and *ago119-1* mutants, but the presence of both mutations was systematically  
143 lethal in the progeny.

144

#### 145 **AGO104 and AGO105/AGO119 bind siRNAs in embryonic cells**

146 To establish the temporality of biogenesis of siRNAs in maize, we extracted small RNAs from mature  
147 and immature ears, and pollen in a heterozygous *mop1-1* (*B'* epiallele) plant and in a homozygous  
148 *mop1-1* (*B-I* epiallele) plant. We used stem-loop RT-PCR to amplify three selected siRNAs of 24-nt,  
149 namely R3, S3 and S4. R3 siRNAs are produced from transposons in a RdDM-dependent manner [28]  
150 and were used as positive control. S3 and S4 siRNAs are transcribed from the *b1TRs* and are involved  
151 in paramutation [7]. As expected, R3 was expressed in the *B'* plants, but not in the *mop1-1* RdDM  
152 mutant. In contrast, *b1TRs'* siRNAs (S3 and S4) were detected in tissues from both *B'* and *mop1-1* plants  
153 (Fig 3a), suggesting that a second pathway produces the paramutation-linked siRNAs in reproductive  
154 tissues.

155

156 To be relevant to our study, these siRNAs must be expressed in the same tissues and at the same time  
157 as AGO104 or AGO105. Therefore, we conducted an immunolocalization experiment using an anti-  
158 AGO104 antibody to determine the cellular location of AGO104 in young embryos of the B73 inbred  
159 line. We found that AGO104 was expressed in the cytoplasm of embryonic cells (Fig 3b). This profile is  
160 similar to that of AGO9 in *A. thaliana* [20]. Similarly, using an antibody against a common peptide of  
161 AGO105 and AGO119, we found that both proteins are expressed specifically in the nucleus of the  
162 embryo's cells (Fig 3b). This data strengthens the hypothesis that *ago104* is an orthologue of *AtAGO9*,  
163 and *ago105/ago119* are orthologues of *AtAGO4*. We later performed an immunoprecipitation (IP) of  
164 AGO104 and AGO105/AGO119 in mature and immature ears and pollen. The results showed a strong  
165 expression of these proteins in immature reproductive tissues, mostly in female reproductive organs  
166 (Fig 3c). Finally, we wanted to verify whether the *mop1-1* mutation altered the AGO protein repertoire  
167 in maize and we conducted IPs using AGO104 and AGO105/AGO119 as baits in *mop1-1* mutant. The  
168 three AGOs were detected in reproductive tissues of *mop1-1* mutant suggesting that, contrary to that  
169 observed in *A. thaliana* [21], reduced levels of small RNAs in maize do not alter the integrity of  
170 ARGONAUTE proteins.

171

172 We then extracted the small RNAs from the IPs mentioned above. We hypothesized that siRNAs that  
173 are carried by AGO104, AGO105 or AGO119 should be correctly amplified and visible on a migration  
174 gel after a stem-loop RT-PCR. As expected, the control R3 siRNA (RdDM-dependent) was amplified and  
175 visible on the migration gel (S3b Fig). Therefore, our protocol allows to extract and identify the siRNAs  
176 loaded in AGO proteins. Interestingly, R3 siRNAs extracted from the IPs of mature ears were less  
177 abundant than those detected in immature ears. In contrast, we were not able to visualize S3 siRNAs  
178 involved in paramutation in both mature or immature ears (S3b Fig). However, when extracted directly  
179 from mature and immature ears, S3 siRNAs could be detected. We can draw two hypotheses from this  
180 result: either AGOs do not bind S3 siRNAs involved in paramutation, or our experiment using stem-  
181 loop RT-PCR is not sensitive enough to visualize it.

182

### 183 **AGO104 and AGO105/AGO119 bind 24-nt siRNAs involved in paramutation**

184 We then sequenced the small RNAs recovered from immature ears of AGO104 IPs in plants producing  
185 normal and reduced amounts of 24-nt siRNAs. The normal 24-nt siRNA production is represented by  
186 B73 plants (*b* allele) and heterozygous *mop1-1* mutant (*B'* epiallele), and the reduced 24-nt siRNA  
187 production is represented by homozygous *mop1-1* mutant (*B-l* epiallele) and homozygous *ago104-5*  
188 mutant (*b* allele). We first evaluated the expression level for the three studied siRNAs in each genotype.  
189 Interestingly, we identified R3 siRNAs in all four genetic backgrounds, which can be explained by a  
190 weak sensitivity of the previous stem-loop RT-PCR experiments. Moreover, we identified S3 and S4  
191 siRNAs in none of the genetic backgrounds (S3c Fig). This means that AGO104 does not bind the S3  
192 and S4 sRNA in immature ears. Next, we aligned AGO104-associated small RNAs onto the B73  
193 reference genome, and all genotypes displayed a very similar chromosome-scale coverage (S4 Fig). We  
194 evaluated the size of the reads and mapped them to a 100kb where we replaced the *b1* promoting  
195 sequences of B73 genome by the *b1TR*'s repeats [5] (accession AF483657) (Fig 4). AGO104 from plants  
196 producing normal amounts of 24-nt siRNA (heterozygous *mop1-1* mutant, *B'* epiallele) carried mostly  
197 24-nt small RNAs, which mapped to the *b1TR*'s region. This result indicates that AGO104 from  
198 heterozygous *mop1-1* (*B'* epiallele) binds the 24-nt siRNAs associated with paramutation. On the other  
199 hand, AGO104 from homozygous *mop1-1* mutant (*B-l* epiallele) carried mostly 22-nt small RNAs, which  
200 did not map to the *b1TR*'s. This indicates that in homozygous *mop1-1* plants (*B-l* epiallele), AGO104  
201 does not bind *b1TR* associated 24-nt siRNAs. It has been shown that the *b* allele produces the same  
202 *b1TR* siRNAs as *B-l* allele [7]. Therefore, small RNAs from AGO104 of the *ago104-5* mutant (*b* allele)  
203 were also aligned on the B73 sequence with the 7 tandem repeats. Interestingly, AGO104's small RNAs  
204 from *ago104-5* mutant display a profile similar to that of homozygous *mop1-1* plants (*B-l* epiallele).  
205 Taken together, these results indicate that AGO104 binds *b1TR* associated 24-nt siRNAs, and that its  
206 involvement is crucial to enable paramutation.

207



208 Finally, we verified whether AGO105/AGO119, like AGO104, binds paramutation-associated small  
209 RNAs. We sequenced the small RNA-IPs of AGO105/AGO119 and AGO104 that we generated from  
210 immature ears of wild type B73 plants (*b* allele). We also downloaded small RNAs extracted directly  
211 from B73 young ears [29] (accession GSM918110). We identified a 8-kb sequence that span the *b1*-  
212 single repeat of B73 and its upstream sequence in the B73 genome. The three small RNA datasets were  
213 mapped to the 8-kb sequence, and they covered most of the *b1*-single repeat (Fig 5). Small RNAs  
214 produced by B73 (*b* allele) at the *b1*-single repeat are identical to those produced by *B-1* at the *b1TR*  
215 locus [7]. Therefore, we can conclude that both AGO104 and AGO105/AGO119 bind *b1TR* small RNAs,  
216 and are involved in paramutation. Interestingly, the small RNAs extracted from AGO104 and those  
217 extracted from AGO105/AGO119 are quite similar: they map to the same locations on the *b1*-single  
218 repeat, and the first base preference tends to favor adenine and disadvantage thymine in both AGO104  
219 and AGO105/AGO119 (S5 Fig). This might indicate a similar involvement in paramutation. The evidence  
220 from this study suggests that AGO105 and/or AGO119 are involved in paramutation.

221

222

## 223 Discussion

224 The reverse genetic screening performed on *ago104-5* and *ago105-1* mutants helps understanding  
225 their involvement in paramutation. Paramutation at the *b1* locus involves the *B-1* and *B'* epialleles,  
226 respectively associated with intense and weak plant pigmentations [30]. Here, we unveiled an  
227 intermediate plant pigmentation phenotype appearing in the progeny of *ago104-5* mutants with the  
228 *B'* allele, which turns darker over time. Previous description of *mop2* mutant also reported an evolution  
229 of pigmentation over time, but never rising up to the levels of homozygous *mop1-1* mutant [25]. This  
230 suggests that the *ago104-5* mutation disrupted paramutation in its progeny at the *b1* locus. Two  
231 conclusions can be drawn from these results. First, AGO104 is an effector of paramutation at the *b1*  
232 locus. Second, the parental genotype of *ago104-5* mutants influenced their progeny's phenotype, with  
233 the interaction taking place in reproductive tissues. In accordance with our results of IP and

234 immunolocalization, previous studies have demonstrated that AGO104 is located exclusively in  
235 reproductive tissues, where paramutation is established. These tissues include female and male  
236 meiocytes, egg cells, but not the gametic precursors [22]. Interestingly, *b1* is expressed in somatic  
237 tissues only [7], where maintenance of paramutation takes place, and where AGO104 is never  
238 expressed. Hence, AGO104 is probably involved in the establishment rather than the maintenance of  
239 paramutation. On the other hand, the *ago105-1* mutation did not display any phenotype that was  
240 differing from the control groups. This result may be explained by the fact that previous studies  
241 identified AGO119 as closely related to AGO105 [22]. Therefore, AGO119 might complement  
242 mutations in *Ago105* and prevent the establishment of new phenotypes. The double *ago105/ago119*  
243 mutants were lethal, which prevented further analysis on that hypothesis. Our reverse genetic  
244 screenings enabled us to identify AGO104 as an effector of paramutation at the *b1* locus.

245

246 Understanding the similarities between maize and *A. thaliana* AGO proteins is a first step to  
247 understand their function in maize. In *A. thaliana*, AGO4/6/9 have closely related sequences, closely  
248 related functions, and interact with small RNAs of the same size [21]. Within the AGO family of  
249 Arabidopsis, they belong to the same clade [31]. Maize *ago104*, *ago105* and *ago119* are close  
250 homologs of *AtAGO4/6/9*. Our results show that *ZmAGO104* is present in the cytoplasm of embryos,  
251 just like *AtAGO9* [20]. Similarly, *ZmAGO105* and *ZmAGO119* are located in the nucleus of embryos, like  
252 *AtAGO4*. This different localization in *A. thaliana*'s embryos does not prevent the involvement of both  
253 *AtAGO4* and *AtAGO9* in gamete formation [20,21]. Therefore, an involvement of AGO104, AGO105  
254 and AGO119 in maize RdDM can be expected despite their different localization in embryonic cells.  
255 Based on our results of immunolocalization and on sequence similarities previously reported [22], we  
256 argue that maize AGO104 and AGO105/AGO119 are orthologs of *AtAGO9* and *AtAGO4*, respectively.  
257 In support of this claim, as their orthologs *AtAGO9* and *AtAGO4* [21], maize AGO104, AGO105 and  
258 AGO119 bind preferentially 24-nt small RNAs. Some of these 24-nt small RNAs extracted from AGO104  
259 and AGO105/AGO119 mapped to the *b1TRs* involved in paramutation. Prior studies have emphasized

260 the importance of the first half of the *b1TR* sequence for the paramutagenicity of the *b1* locus [32].  
261 Interestingly, AGO104 and AGO105/AGO119 load *b1TR*'s siRNAs that map to this first half of the  
262 repeats, even though *ago105-1* mutants did not show any phenotype. This might indicate a hierarchy  
263 in the requirement of these AGOs in paramutation, and a complementation of *ago105-1* by other  
264 AGOs, like AGO119.

265

266 To expand our comparison between the AGOs of maize and *A. thaliana*, we considered the degradation  
267 process of the *At*AGOs. In the *rdr2* mutant in *A. thaliana* (*mop1* in maize), the levels of 24-nt siRNAs  
268 are low, and the AGO4s, AGO6s and AGO9s are degraded [21]. Our quantification of AGO104 and  
269 AGO105/AGO119 in *mop1-1* mutant of maize showed that the decrease in 24-nt siRNAs production  
270 does not influence the stability of the AGO104 and AGO105/AGO119 proteins. This suggests that either  
271 the degradation mechanisms are different in maize or there is a pathway capable of rescuing AGO104  
272 and AGO105/AGO119 independently of MOP1-dependent siRNAs. As previously shown in *A. thaliana*,  
273 there is more than one pathway that produces 24-nt siRNAs. Within the highly conserved RdDM  
274 mechanism, there are “canonical” and “alternative” pathways that enable the synthesis of 24-nt  
275 siRNAs without the involvement of *RDR2* [33]. The same happens in maize, which can create some 24-  
276 nt siRNAs without the involvement of MOP1 [34,35]. It is therefore logical that we could amplify  
277 paramutation-linked 24-nt siRNAs in homozygous *mop1-1* mutant (Fig 3a). However, the production  
278 of 24-nt small RNAs in the *mop1-1* mutant is partially replaced by 22-nt small RNAs [34]. This supports  
279 our results in which AGO104 proteins in homozygous *mop1-1* mutant did not carry S3 and S4 siRNAs  
280 (S3c Fig), and they carried more 22-nt small RNAs than 24-nt small RNAs (Fig 4a). A possible explanation  
281 for this might be that the 22-nt small RNAs in *mop1-1* mutant contribute to rescue AGO proteins, but  
282 they do not mediate paramutation at the *b1* locus.

283

284 This study has identified one new actor of paramutation in maize, and has shown that more  
285 ARGONAUTE proteins are involved, through a reverse genetic approach, and by sequencing small RNAs

286 loaded onto AGO proteins. These experiments confirmed that AGO104 is involved in paramutation in  
287 maize and binds paramutation-associated siRNAs. It is involved in the establishment of paramutation  
288 in the reproductive tissues of maize through the effector complex of RdDM. Although no phenotype  
289 was associated to the *ago105-1* mutation, AGO105 and/or AGO119 were found to be involved in RdDM  
290 and to bind paramutation-associated siRNAs as well. While more actors need to be identified to  
291 complete our knowledge of the pathways involved in paramutation, our findings shed new light on the  
292 mechanisms mediating both the establishment and the transmission of paramutation in maize.

293

294

## 295 **Materials and methods**

### 296 **Plant material**

297 The *ago105-1* mutant is available at the Maize Genetics Cooperation Stock Center under reference  
298 UFMu-05281. B73 inbred line was provided by the Maize Genetics Cooperation Stock Center. The Trait  
299 Utility System for Corn (TUSC) at Pioneer Hi-Breed provided *ago104-5* stocks and V.L. Chandler  
300 (University of Arizona, Tucson, AZ, USA) provided the *mop1-1* mutants. Plants were grown in a  
301 greenhouse at the French National Research Institute for Sustainable Development in Montpellier,  
302 France, with 14 hours day light (26°C during the day, 20°C at night). For all these plants, pollen,  
303 immature and mature ears were collected and immediately snap frozen in liquid nitrogen and stored  
304 at -80°C before use.

305

### 306 **Immunolocalization**

307 Fertilized ovaries from B73 plants were collected 3 days after pollination (DAP) and sliced using a  
308 Vibratom (Leica VT1000E) to create 200 to 225 µm sections. They were left 2 hours in fixating solution  
309 (4% paraformaldehyde, PBS 1X, 1% Tween 20, 0.1 mM PMSF) and washed 3 times in PBS (Phosphate  
310 Buffered Saline). Samples were then digested for 15min at room temperature using an enzymatic  
311 solution (1% driselase, 0.5% cellulase, 1% pectolyase, 1% BSA, all from Sigma-Aldrich), and washed 3

312 times in PBS. Samples were left 1 hour in permeabilizing solution (PBS 1X, 2% Tween 20, 1% BSA) in  
313 ice, and were then washed 3 times in PBS and incubated overnight at 4°C with primary antibodies  
314 (listed in S1 Table) concentrated at 1:50 for AGO104 and 1:200 for AGO105/AGO119. Samples were  
315 left 8 hours in washing solution (PBS 1X, 0,2% Tween 20) with solution renewal every 2 hours. They  
316 were incubated overnight in secondary antibody (1:200) labeled with Alexa Fluor 488, and left 6 hours  
317 in washing solution. They were then incubated 1 hour in DAPI, rinsed with PBS 1X, and mounted in  
318 ProLong Antifade Reagent (Invitrogen). Slides were sealed with nail polish and stored at -20°C.  
319 Observations were made using LEICA SPE with 405 nm (DAPI) and 488 nm (Alexa fluor 488) excitation.

320

### 321 **Small-RNA Immunoprecipitation**

322 Protocols were adapted from [21] using two biological replicates per genotype. Tissues were grinded  
323 with liquid nitrogen and a Dounce homogenizer. Resulting powder was placed in a Falcon tube with 3  
324 volumes of extraction buffer (20 mM Tris HCL pH 7.5, 5 mM MgCl<sub>2</sub>, 300 mM NaCl, 0.1% NP-40, 5 mM  
325 DTT, 1% protease inhibitor (Roche Tablet), 100 units/mL RNase OUT (Invitrogen)). Samples were  
326 vortexed, kept on ice 30 minutes with recurrent shaking, and centrifuged 20 minutes at 4°C, 4000 rpm.  
327 Supernatants were filtered through a 0.45µm filter into a new Falcon tube, and 1 mL and aliquoted  
328 and stored at -20°C as a pre-experiment input sample. In the remaining samples, 2 mL aliquots were  
329 generated, and we added 5 µg of antibodies per gram of tissue. They were incubated 1h at 4°C on a  
330 rotation wheel. Magnetic beads (Dynabeads, Life technologies) were washed 3 times in wash buffer  
331 (20 mM Tris HCL pH 7.5, 5 mM MgCl<sub>2</sub>, 300 mM NaCl, 0.1% NP-40, 1% protease inhibitor (Roche Tablet),  
332 100 units/mL RNase OUT (Invitrogen)). 20 µL of washed beads were added to each sample and  
333 incubated on rotation wheel for 2 hours at 4°C. Beads from the samples were washed 3 times in wash  
334 buffer and resuspended in 500 µL. 100 µL was aliquoted and stored at -20°C for the Western blot  
335 control. Wash buffer was discarded and replaced by 250 µL of elution buffer (100 mM NaHCO<sub>3</sub>, 1%  
336 SDS, 100 units/mL RNase OUT (Invitrogen) in 0,1% DEPC water according to [36], and tubes incubated  
337 15 minutes at 65°C with agitation. Supernatant was transferred to fresh tubes and elution was

338 repeated once. The two eluates were finally combined. Samples were treated with 0.08 µg/µL  
339 proteinase K for 15 minutes at 50°C. RNAs were extracted following the recommendations from  
340 Applied Biosystems for TRI Reagent® Solution, starting by adding 1.2 mL of TRI Reagent to the samples.

341

#### 342 **Stem loop RT PCR**

343 Small RNAs extracted from the RNA-IP were treated with DNase to remove a potential contamination  
344 with DNA, using the TURBO DNA-free kit (AM1907, Ambion Life technologies). In the DNA-free  
345 samples, 50 µM of stem-loop primer (listed in S2 Table), 10 mM of dNTP and nuclease-free water were  
346 added to reach 13 µL. The stem-loop reverse transcription was done following the recommendations  
347 from [37] resulting double stranded cDNA was used for PCR. 1 µL of cDNA was mixed with Red Taq 2x  
348 (Promega), and 0,25 µM of universal reverse primer (complementary to the stem loop one) and a  
349 specific forward primer, designed to match the *b1TR* siRNAs. The tubes filled with 20 µL of reaction  
350 were denatured for 2 minutes at 94°C, and went through 40 cycles of 15 seconds at 94°C and 1 minute  
351 at 60°C. Migration was done on 2% agarose gels (Lonza) with TBE 0.5X and 0.5 µg/mL BET. 100 bp  
352 Promega DNA Ladder was added, and migration was done 40 minutes at 100 volts. To make sure that  
353 the resulting bands are indeed the cDNAs from *b1TR* siRNA, the content of the gel bands were  
354 recovered using the QIAquick gel extraction kit (QIAGEN). Resulting DNA was cloned in DH5α  
355 competent cells (Invitrogen) using the pGEM-T Easy Vector Systems protocol (Promega) and an LB-  
356 ampicillin selective medium. Colonies were genotyped using the T7/SP6 primers (Promega). Plasmids  
357 from the validated colonies were isolated using the QIAprep Spin Miniprep Kit (QIAGEN) and sent for  
358 sequencing at Beckman Coulter genomics.

359

#### 360 **Western blot**

361 The protocols were adapted from [38]. Various types of tissues were collected: pollen, mature and  
362 immature ears from B73, and mature ears from *mop1-1* mutants. Tissues were grinded with liquid  
363 nitrogen and mixed with extraction buffer (125 mM Tris pH 8.8, 1% SDS, 10% glycerol, 10 mM EDTA, 1

364 mM PMSF, 1% protease inhibitor (Roche Tablet)). Samples were centrifuged 20 minutes at 4000 rpm  
365 at 4°C. Pellet were added 0.1 volume of Z buffer (125 mM Tris pH 6.8, 12% SDS, 10% glycerol, 5 mM  
366 DTT, Bromophenol Blue). Proteins in the supernatant were quantified using the Bio-Rad protein assay.  
367 15 µg of proteins were aliquoted and 0.1 volume of Z buffer was added. The control samples from the  
368 RNA-IP were added Laemmli 4X (250 mM Tris pH 6.8, 4% SDS, 20% glycerol, 10 mM DTT, Bromophenol  
369 Blue), and incubated 15 minutes at 90°C. Migration was done at 180 volts for 45 minutes in migration  
370 buffer 1X (25 mM Tris base, 190 mM glycine, 0.1% SDS) with PageRuller plus ladder (ThermoFisher  
371 Scientific). Transfer was done on a nitrocellulose membrane (Amersham) in transfer buffer (migration  
372 buffer 1X, 20% ethanol), at 125 volts for 2 hours and a half. Membrane was then rinsed in PBST and  
373 left 1 hour in 5% non-fat milk (mixed with PBST). Milk was renewed and added 1/200 antibody  
374 (Eurogentec) against AGO104 or AGO105/AGO119 and left overnight with agitation. Membrane was  
375 washed 4 times in milk, with 5 minutes agitation every time. Milk was then added with 1/2500 HRP  
376 antibody (Invitrogen) and left 2 hours with agitation. Membrane was washed 4 times with PBST and  
377 treated as recommended by ECL plus western blotting detection system (Amersham) with a Typhoon  
378 9400. Membrane was then washed again in PBST and left 30 minutes in Ponceau S Solution (Sigma-  
379 Aldrich) with agitation before a last water washing.

380

### 381 **Small RNA sequencing**

382 Small RNAs extracted from the RNA IP were migrated on a 1.5% agarose gel. Bands corresponding to  
383 small RNAs were collected and their content was recovered using the Monarch DNA Gel Extraction kit  
384 (NEB #T1020 New England Biolab). The sRNA collected were turned into libraries using the NEBNext  
385 Multiplex Small RNA Library Prep Set (NEB #E7300S New England Biolab). The final enrichment PCR  
386 was made with 15 cycles. Samples were quantified with Qubit and Agilent Bioanalyzer using the DNA  
387 high sensitivity assays and were sequenced on a NextSeq550 machine at the CSHL Genome Center.

388

### 389 **Small RNA seq analysis**

390 Sequenced datasets were cleaned using Trimmomatic (Version 0.38) with parameters 2:30:5  
391 LEADING:3 TRAILING:3 SLIDINGWINDOW:4:15 MINLEN:15 MAXLEN:35. Reads were first mapped onto  
392 B73 RefGen\_V5 of the maize genome using Bowtie 1 (Version 1.2.2) with parameters --best -k 2 -5 4 -  
393 p 10. Reads were then intersected into 0.5 Mb genome windows using bedtools coverage. For a better  
394 resolution, reads were also aligned to the *b1TRs* and their 100 kb flanks via Bowtie 1 (Version 1.2.2)  
395 with parameters -m 7 -q --strata --best -v 2. They were intersected into 50 bp genome windows using  
396 bedtools coverage.

397 Small RNA sequencing data were deposited in the Gene Expression Omnibus (GEO) database  
398 (<https://www.ncbi.nlm.nih.gov/geo/>) under the accession number GSE172479.

399

#### 400 **Quantification of plant pigmentation**

401 For pixel color measurement, 2 husks of plants with lightly pigmented, intermediate and dark purple  
402 phenotype were scanned. Identical squares were numerically designed in each husk to ensure an equal  
403 number of pixels, and their color was measured using ImageJ, with a scale from 0 (black pixel) to 255  
404 (white pixel). The resulting pixel color values were averaged for each phenotype and added to Fig 2.

405

#### 406 **Acknowledgments**

407 D.G. received support for the H2020 MCA (REP-658900-2), and *Agence Nationale de la Recherche*  
408 grants REMETH (ANR-15-CE12-0012-03) and CHROMOBREED (ANR-18-CE92-0041). M.A.A.V. received  
409 support from the Jeunes équipes associées à l'IRD (JEA) program (EPIMAIZE), Agropolis Fondation,  
410 CONACYT (158550 & A1-S-38383) and the Royal Society Newton Advanced Fellowship (NA150181).  
411 O.O.L. was the recipient of a graduate scholarship from CONACYT and from the Bourses d'échanges  
412 scientifiques et technologiques IRD (BEST) program. R.A.M. is supported by the Howard Hughes  
413 Medical Institute, and grants from the National Science Foundation. The authors acknowledge  
414 assistance from the Cold Spring Harbor Laboratory Shared Resources, which are funded in part by the  
415 Cancer Center Support Grant (5PP30CA045508).



416

## 417 **Author contributions**

418 **Conceptualization:** Juliette Aubert, Fanny Bellegarde, Olivier Leblanc, Daniel Grimanelli

419 **Data curation:** Juliette Aubert, Olivier Leblanc, Daniel Grimanelli

420 **Formal analysis:** Juliette Aubert, Fanny Bellegarde, Olivier Leblanc

421 **Funding acquisition:** Robert A. Martienssen, Daniel Grimanelli

422 **Investigation:** Juliette Aubert, Fanny Bellegarde, Omar Oltehua-Lopez, Daniel Grimanelli

423 **Methodology:** Juliette Aubert, Fanny Bellegarde, Mario A. Arteaga-Vazquez, Olivier Leblanc, Daniel

424 Grimanelli

425 **Visualization:** Juliette Aubert, Olivier Leblanc, Daniel Grimanelli

426 **Writing – original draft:** Juliette Aubert, Fanny Bellegarde, Mario A. Arteaga-Vazquez, Omar Oltehua-

427 Lopez, Olivier Leblanc, Daniel Grimanelli

428 **Writing – review & editing:** Juliette Aubert, Fanny Bellegarde, Mario A. Arteaga-Vazquez, Omar

429 Oltehua-Lopez, Olivier Leblanc, Robert A. Martienssen, Daniel Grimanelli

430

## 431 **References**

432 1. Arteaga-Vazquez MA, Chandler VL. Paramutation in maize: RNA mediated trans-generational

433 gene silencing. *Current Opinion in Genetics and Development*. Elsevier Ltd; 2010. pp. 156–

434 163. doi:10.1016/j.gde.2010.01.008

435 2. Hollick JB. Paramutation and related phenomena in diverse species. *Nat Rev Genet*. 2017;18:

436 5–23. doi:10.1038/nrg.2016.115

437 3. Hövel I, Pearson NA, Stam M. Cis-acting determinants of paramutation. *Semin Cell Dev Biol*.

438 2015;44: 22–32. doi:10.1016/j.semcdb.2015.08.012

439 4. Giacomelli BJ, Hollick JB. Trans-Homolog interactions facilitating paramutation in maize. *Plant*

440 *Physiol*. 2015;168: 1226–1236. doi:10.1104/pp.15.00591

441 5. Stam M, Belele C, Dorweiler JE, Chandler VL. Differential chromatin structure within a tandem

- 442 array 100 kb upstream of the maize b1 locus is associated with paramutation. *Genes Dev.*  
443 2002;16: 1906–1918. doi:10.1101/gad.1006702
- 444 6. Stam M, Bebele C, Ramakrishna W, Dorweiler JE, Bennetzen JL, Chandler VL. The regulatory  
445 regions required for B' paramutation and expression are located far upstream of the maize b1  
446 transcribed sequences - PubMed. In: *Genetics* [Internet]. 2002 [cited 30 Jul 2020]. Available:  
447 <https://pubmed.ncbi.nlm.nih.gov/12399399/>
- 448 7. Arteaga-Vazquez M, Sidorenko L, Rabanal FA, Shrivistava R, Nobuta K, Green PJ, et al. RNA-  
449 mediated trans-communication can establish paramutation at the b1 locus in maize. *Proc Natl*  
450 *Acad Sci.* 2010;107: 12986–12991. doi:10.1073/pnas.1007972107
- 451 8. Chandler VL, Eggleston WB, Dorweiler JE. Paramutation in maize. *Plant Mol Biol.* 2000;43:  
452 121–145. doi:10.1023/a:1006499808317
- 453 9. Alleman M, Sidorenko L, McGinnis K, Seshadri V, Dorweiler JE, White J, et al. An RNA-  
454 dependent RNA polymerase is required for paramutation in maize. *Nature.* 2006;442: 295–  
455 298. doi:10.1038/nature04884
- 456 10. Erhard KF, Stonaker JL, Parkinson SE, Lim JP, Hale CJ, Hollick JB. RNA polymerase IV functions  
457 in paramutation in *Zea mays*. *Science* (80- ). 2009;323: 1201–1205.  
458 doi:10.1126/science.1164508
- 459 11. Barbour JER, Liao IT, Stonaker JL, Lim JP, Lee CC, Parkinson SE, et al. Required to maintain  
460 repression2 is a novel protein that facilitates locus-specific paramutation in maize. *Plant Cell.*  
461 2012;24: 1761–1775. doi:10.1105/tpc.112.097618
- 462 12. Erhard KF, Parkinson SE, Gross SM, Barbour JER, Lim JP, Hollick JB. Maize RNA polymerase IV  
463 defines trans-generational epigenetic variation. *Plant Cell.* 2013;25: 808–819.  
464 doi:10.1105/tpc.112.107680
- 465 13. Law JA, Jacobsen SE. Establishing, maintaining and modifying DNA methylation patterns in  
466 plants and animals. *Nature Reviews Genetics.* Nature Publishing Group; 2010. pp. 204–220.  
467 doi:10.1038/nrg2719

- 468 14. Matzke MA, Mosher RA. RNA-directed DNA methylation: An epigenetic pathway of increasing  
469 complexity. *Nature Reviews Genetics*. Nature Publishing Group; 2014. pp. 394–408.  
470 doi:10.1038/nrg3683
- 471 15. Matzke MA, Kanno T, Matzke AJM. RNA-Directed DNA Methylation: The Evolution of a  
472 Complex Epigenetic Pathway in Flowering Plants. *Annu Rev Plant Biol*. 2015;66: 243–267.  
473 doi:10.1146/annurev-arplant-043014-114633
- 474 16. Zhang H, Lang Z, Zhu JK. Dynamics and function of DNA methylation in plants. *Nature Reviews*  
475 *Molecular Cell Biology*. Nature Publishing Group; 2018. pp. 489–506. doi:10.1038/s41580-  
476 018-0016-z
- 477 17. Haag JR, Brower-Toland B, Krieger EK, Sidorenko L, Nicora CD, Norbeck AD, et al. Functional  
478 diversification of maize RNA polymerase IV and V subtypes via alternative catalytic subunits.  
479 *Cell Rep*. 2014;9: 378–390. doi:10.1016/j.celrep.2014.08.067
- 480 18. Margis R, Fusaro AF, Smith NA, Curtin SJ, Watson JM, Finnegan EJ, et al. The evolution and  
481 diversification of Dicers in plants. *FEBS Lett*. 2006;580: 2442–2450.  
482 doi:10.1016/j.febslet.2006.03.072
- 483 19. Zhang Z, Teotia S, Tang J, Tang G. Perspectives on microRNAs and phased small interfering  
484 RNAs in maize (*Zea mays* L.): Functions and big impact on agronomic traits enhancement.  
485 *Plants*. 2019;8. doi:10.3390/plants8060170
- 486 20. Olmedo-Monfil V, Durán-Figueroa N, Arteaga-Vázquez M, Demesa-Arévalo E, Autran D,  
487 Grimanelli D, et al. Control of female gamete formation by a small RNA pathway in  
488 *Arabidopsis*. *Nature*. 2010;464: 628–632. doi:10.1038/nature08828
- 489 21. Havecker ER, Wallbridge LM, Hardcastle TJ, Bush MS, Kelly KA, Dunn RM, et al. The  
490 *Arabidopsis* RNA-directed DNA methylation argonauts functionally diverge based on their  
491 expression and interaction with target loci. *Plant Cell*. 2010;22: 321–334.  
492 doi:10.1105/tpc.109.072199
- 493 22. Singh M, Goe S, Meeley R, Dantec C, Parrinello H, Michaud C, et al. Production of Viable

- 494 Gametes without Meiosis in Maize Deficient for an ARGONAUTE Protein. 2011;23: 443–458.  
495 doi:10.1105/tpc.110.079020
- 496 23. Dorweiler JE, Carey CC, Kubo KM, Hollick JB, Kermicle JL, Chandler VL. *mediator of*  
497 *paramutation1* Is Required for Establishment and Maintenance of Paramutation at Multiple  
498 Maize Loci. *Plant Cell*. 2000;12: 2101–2118. doi:10.1105/tpc.12.11.2101
- 499 24. Hollick JB, Kermicle JL, Parkinson SE. Rmr6 maintains meiotic inheritance of paramutant states  
500 in *Zea mays*. *Genetics*. 2005;171: 725–740. doi:10.1534/genetics.105.045260
- 501 25. Sidorenko L, Dorweiler JE, Cigan AM, Arteaga-Vazquez M, Vyas M, Kermicle J, et al. A  
502 dominant mutation in mediator of paramutation2, one of three second-largest subunits of a  
503 plant-specific RNA polymerase, disrupts multiple siRNA silencing processes. *PLoS Genet*.  
504 2009;5. doi:10.1371/journal.pgen.1000725
- 505 26. Stonaker JL, Lim JP, Erhard KF, Hollick JB. Diversity of Pol IV function is defined by mutations  
506 at the maize *rmr7* locus. *PLoS Genet*. 2009;5. doi:10.1371/journal.pgen.1000706
- 507 27. Chandler VL. Poetry of b1 paramutation: cis- and trans-chromatin communication. *Cold Spring*  
508 *Harbor Symposia on Quantitative Biology*. Cold Spring Harbor Laboratory Press; 2004. pp.  
509 355–361. doi:10.1101/sqb.2004.69.355
- 510 28. Jia Y, Lisch DR, Ohtsu K, Scanlon MJ, Nettleton D, Schnable PS. Loss of RNA-dependent RNA  
511 polymerase 2 (RDR2) function causes widespread and unexpected changes in the expression  
512 of transposons, genes, and 24-nt small RNAs. *PLoS Genet*. 2009;5.  
513 doi:10.1371/journal.pgen.1000737
- 514 29. Barber WT, Zhang W, Win H, Varala KK, Dorweiler JE, Hudson ME, et al. Repeat associated  
515 small RNAs vary among parents and following hybridization in maize. *Proc Natl Acad Sci U S A*.  
516 2012;109: 10444–10449. doi:10.1073/pnas.1202073109
- 517 30. Coe EH. A Regular and Continuing Conversion-Type Phenomenon at the B Locus in Maize.  
518 *Proc Natl Acad Sci ....* 1959; 828–832. doi:10.1056/NEJMoa1207541
- 519 31. Zhang Z, Liu X, Guo X, Wang XJ, Zhang X. Arabidopsis AGO3 predominantly recruits 24-nt small

- 520 RNAs to regulate epigenetic silencing. *Nat Plants*. 2016;2: 1–7. doi:10.1038/NPLANTS.2016.49
- 521 32. Belele CL, Sidorenko L, Stam M, Bader R, Arteaga-Vazquez MA, Chandler VL. Specific Tandem  
522 Repeats Are Sufficient for Paramutation-Induced Trans-Generational Silencing. *PLoS Genet*.  
523 2013;9. doi:10.1371/journal.pgen.1003773
- 524 33. Cuerda-gil D, Slotkin RK. Non-canonical RNA-directed DNA methylation. *Nat Plants*. 2016;2.  
525 doi:10.1038/NPLANTS.2016.163
- 526 34. Nobuta K, Lu C, Shrivastava R, Pillay M, De Paoli E, Accerbi M, et al. Distinct size distribution of  
527 endogenous siRNAs in maize: Evidence from deep sequencing in the *mop1-1* mutant. *Proc*  
528 *Natl Acad Sci U S A*. 2008;105: 14958–14963. doi:10.1073/pnas.0808066105
- 529 35. Wang P-H, Wittmeyer KT, Lee T, Meyers BC, Chopra S. Overlapping RdDM and non-RdDM  
530 mechanisms work together to maintain somatic repression of a paramutagenic epiallele of  
531 maize pericarp color1. Antoniewski C, editor. *PLoS One*. 2017;12: e0187157.  
532 doi:10.1371/journal.pone.0187157
- 533 36. Terzi LC, Simpson GG. Arabidopsis RNA immunoprecipitation. *Plant J*. 2009;59: 163–168.  
534 doi:10.1111/j.1365-313X.2009.03859.x
- 535 37. Varkonyi-Gasic E, Wu R, Wood M, Walton EF, Hellens RP. Protocol: A highly sensitive RT-PCR  
536 method for detection and quantification of microRNAs. *Plant Methods*. 2007;3: 12.  
537 doi:10.1186/1746-4811-3-12
- 538 38. Martínez-García JF, Monte E, Quail PH. A simple, rapid and quantitative method for preparing  
539 Arabidopsis protein extracts for immunoblot analysis. *Plant J*. 1999;20: 251–257.  
540 doi:10.1046/j.1365-313X.1999.00579.x

541

542

## 543 Supporting information

544 **S1 Fig. Use of *ago104-5* and *ago105-1* mutants to create a paramutagenic population for a reverse**  
545 **genetic screening.**

- 546 **S2 Fig. Evolution of mutant phenotypes at 35, 46 and 56 days post-seeding (dps).**
- 547 **S3 Fig. Presence of R3, S3 and S4 siRNAs loaded into AGO104 and AGO105/AGO119 in various**
- 548 **genetic backgrounds.**
- 549 **S4 Fig. siRNA coverage on the 10 maize chromosomes of B73 reference genome (version 5).**
- 550 **S5 Fig. First base nucleotide bias in siRNAs bound by AGO104 and AGO105/AGO119.**
- 551 **S1 Table. Antibodies characteristics.**
- 552 **S2 Table. Primer sequences used for siRNA stem loop RT-PCR.**
- 553

### RdDM in *Arabidopsis thaliana*

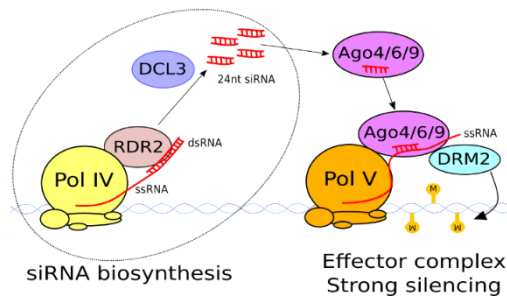

### RdDM in *Zea mays*

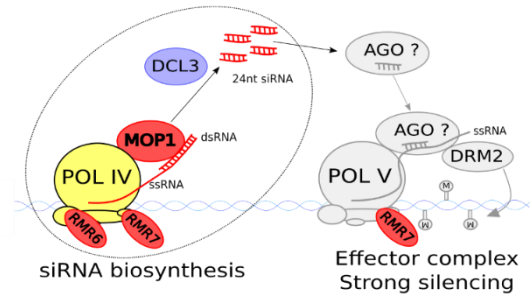

554

555 **Fig 1. Illustration of the actors of the two steps of the RNA directed DNA Methylation (RdDM) in**

556 ***Arabidopsis thaliana* and *Zea mays*.**

557 The red font color with MOP1, RMR6 and RMR7 are involved in paramutation by performing siRNA

558 biosynthesis. RMR7 is a subunit of both POLIV and POLV. Grey font color show proteins that were not

559 identified in maize yet but added here as hypothetic effectors by homology with *A. thaliana*.

560

**a**

| Genotype                       | Epiallele  | Phenotype at 46 dps (%)                  | N plants | References               |
|--------------------------------|------------|------------------------------------------|----------|--------------------------|
| <i>mop1/mop1</i>               | <i>B-l</i> | 100% dark purple                         | 13       | (Dorweiler et al., 2000) |
| <i>Mop1/Mop1</i>               | <i>B'</i>  | 100% lightly pigmented                   | 1        | (Dorweiler et al., 2000) |
| <i>Ago104/Ago104;Mop1/mop1</i> | <i>B'</i>  | 29% lightly pigmented ; 71% intermediate | 14       |                          |
| <i>Ago104/ago104;Mop1/mop1</i> | <i>B'</i>  | 33% lightly pigmented ; 67% intermediate | 8        |                          |
| <i>ago104/ago104;Mop1/mop1</i> | <i>B'</i>  | 100% lightly pigmented                   | 1        | (Singh et al., 2011)     |

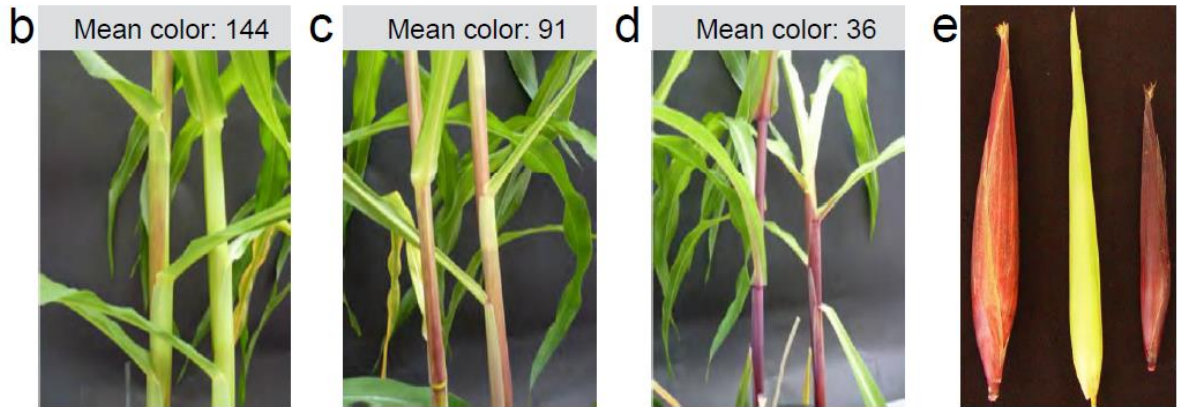

561

562 **Fig 2. Occurrence of the intermediate pigmentation in the paramutagenic population.**

563 (a) Percentage of plants with either dark purple, light purple or intermediate phenotype for each  
564 genotype at 46 dps. The total number of plants obtained for each genotype is indicated. (b) Stem

565 with a lightly pigmented phenotype. (c) Stem with an intermediate phenotype. (d) Stem with a fully  
566 pigmented dark purple phenotype. (e) Ears with intermediate, light purple and dark purple

567 phenotype (from left to right). Mean color indicates the average pixel color from 2 different husk of  
568 each phenotype. It is evaluated from 0 (black pixel) to 255 (white pixel). Results from the 3

569 phenotypes are statistically different from each other (ANOVA p-value = 0,00385 and Tukey's 'Honest  
570 Significant Difference' p-value < 0,02).

571

a

| Genotype                       | Epiallele  | Mature inflorescence | Immature inflorescence | Immature pollen | Ears during gametogenesis | Ears during sporogenesis |
|--------------------------------|------------|----------------------|------------------------|-----------------|---------------------------|--------------------------|
| <i>mop1/mop1</i>               | <i>B-I</i> | S4                   | none                   | S4, S3          | S3                        | NA                       |
| <i>Ago104/Ago104;Mop1/mop1</i> | <i>B'</i>  | R3, S4               | R3, S4                 | R3, S3, S4      | R3, S3                    | R3, S3                   |

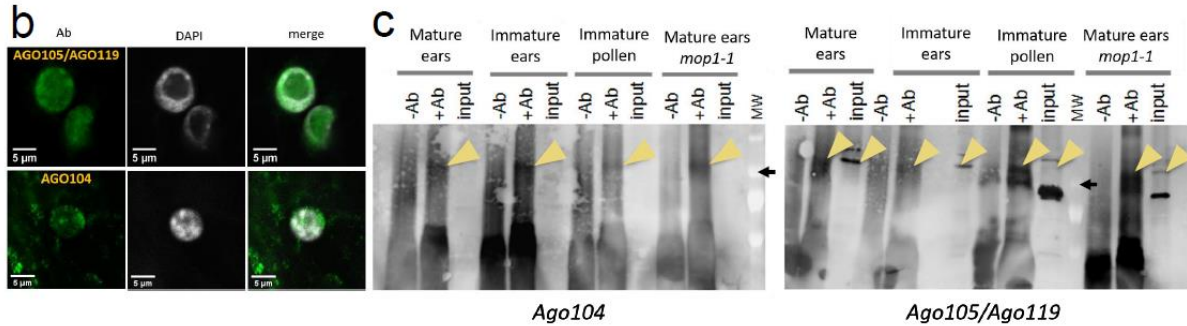

572

573 **Fig 3. Location of *b1TR* siRNAs and AGO104/AGO105/AGO119 in reproductive tissues.**

574 (a) Results of stem-loop RT-PCR in five reproductive tissues for R3, S3 and S4 siRNAs. siRNAs class is  
 575 indicated when detected. Results were identical in *B'* plants with light and intermediate  
 576 pigmentation phenotypes. NA: no data available. (b) Fluorescence of AGO105/AGO119 and AGO104  
 577 in nuclei of B73 embryonic cells. (c) Immunoprecipitation of AGO104 and AGO105/AGO119 in four  
 578 reproductive tissues. Yellow arrowheads indicate the location of the expected band. +Ab and -Ab are  
 579 the IP samples treated with and without antibodies, respectively. Input is the sample that did not  
 580 undergo IP. MW is the molecular weight, the black arrow indicates 100 kD.

581





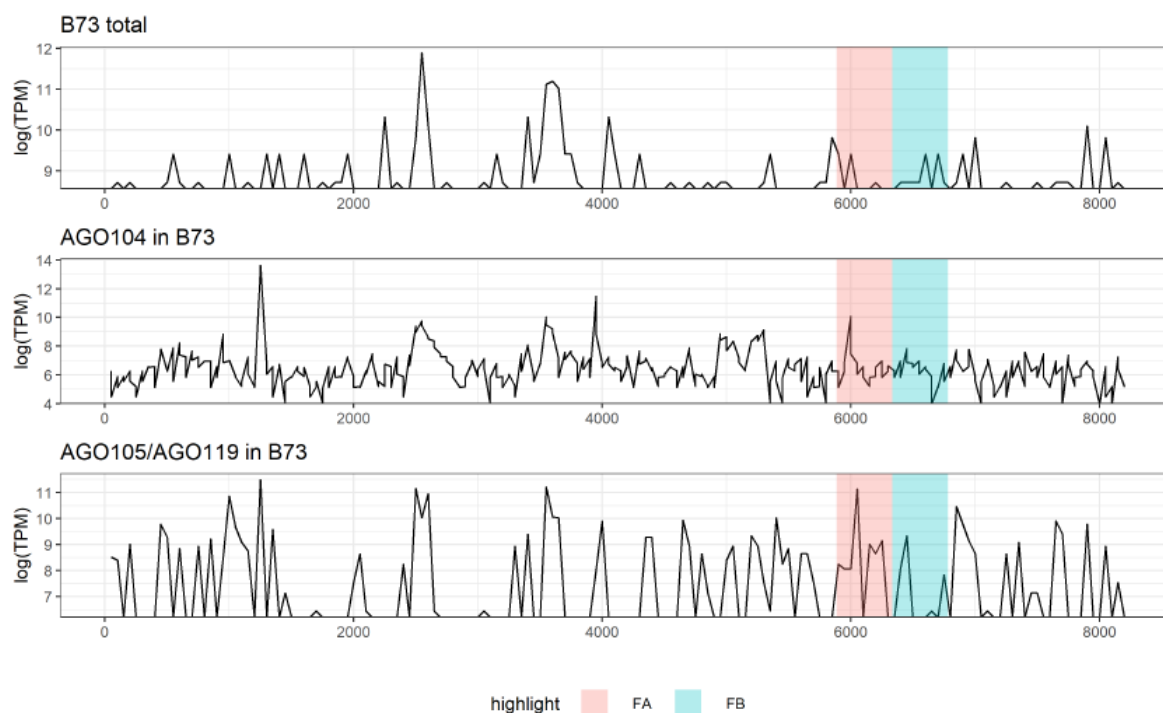

589

590 **Fig 5. Reads distribution of small RNAs at B73 single repeat and its promoter sequence.**

591 Reads marked as "B73 total" are small RNAs extracted from B73 young ears ([29] accession

592 GSM918110). Reads marked as "AGO104 in B73" and "AGO105/AGO119 in B73" are small RNAs

593 respectively extracted from AGO104 and AGO105/AGO119 of B73 young ears. FA (pink box) and FB

594 (blue box) are the two halves of the B73 single-repeat, as proposed by [32]. x-axis is in base pairs.

595
